# Supplementary material for: Carbon cycling at the aquatic-terrestrial interface is linked toparafluvial hyporheic zone inundation history
Source: Copernicus journal article supplement (doi:10.5194/bg-2017-28), 2017-02-20
Supplement: Supplementary file 1 [file bg-2017-28-supplement.pdf]

# Supplement of

## Carbon cycling at the aquatic-terrestrial interface is linked to parafluvial hyporheic zone inundation history

Amy E. Goldman<sup>1</sup>, Emily B. Graham<sup>1</sup>, Alex R. Crump<sup>1</sup>, David W. Kennedy<sup>1</sup>, Elvira B. Romero<sup>1</sup>,  
5 Carolyn G. Anderson<sup>1</sup>, Karl L. Dana<sup>1</sup>, Charles T. Resch<sup>1</sup>, Jim K. Fredrickson<sup>1</sup>, and James C. Stegen<sup>1</sup>

<sup>1</sup>Pacific Northwest National Laboratory, Richland, 99352, USA

*Correspondence to:* Amy E. Goldman (amy.goldman@pnnl.gov)

### Supplementary material

10 **Table S1. OTUs identified from 16S and ITS sequencing.**

|                      | # OTUs |
|----------------------|--------|
| Total 16S sequencing | 9893   |
| Bacteria             | 9470   |
| Archaea              | 2313   |
| Unidentified kingdom | 305    |
| Total ITS sequencing | 1856   |
| Fungi                | 1818   |
| Unidentified kingdom | 722    |

**Table S2. Bacteria, archaea, and fungi classes with 1% abundance or greater.**

|                        | 0 m   |      | 2 m   |      | 4 m   |      | 6 m   |      |
|------------------------|-------|------|-------|------|-------|------|-------|------|
|                        | Mean  | SD   | Mean  | SD   | Mean  | SD   | Mean  | SD   |
| <b>Bacteria</b>        |       |      |       |      |       |      |       |      |
| Unidentified class     | 3.10  | 0.83 | 1.72  | 0.11 | 1.32  | 0.02 | 1.78  | 0.78 |
| <i>Proteobacteria</i>  |       |      |       |      |       |      |       |      |
| Betaproteobacteria     | 10.24 | 1.54 | 9.40  | 1.24 | 10.69 | 0.85 | 8.66  | 1.64 |
| Alphaproteobacteria    | 9.91  | 0.83 | 11.18 | 1.56 | 12.63 | 1.93 | 17.95 | 3.29 |
| Gammaproteobacteria    | 8.64  | 1.11 | 5.80  | 1.08 | 7.37  | 2.79 | 6.76  | 1.89 |
| Deltaproteobacteria    | 8.66  | 1.46 | 6.68  | 0.44 | 5.50  | 1.12 | 4.83  | 0.83 |
| TA18                   | 0.54  | 0.11 | 0.25  | 0.06 | 0.16  | 0.03 | 0.10  | 0.03 |
| <i>Bacteroidetes</i>   |       |      |       |      |       |      |       |      |
| Sphingobacteriia       | 10.90 | 1.77 | 12.73 | 3.23 | 16.55 | 4.29 | 14.66 | 2.40 |
| Flavobacteriia         | 2.38  | 0.71 | 1.92  | 0.82 | 2.81  | 2.39 | 1.79  | 1.36 |
| Cytophagia             | 2.32  | 0.43 | 2.66  | 1.22 | 2.83  | 1.22 | 3.17  | 0.34 |
| <i>Acidobacteria</i>   |       |      |       |      |       |      |       |      |
| Acidobacteria          | 8.13  | 1.18 | 9.46  | 1.02 | 9.62  | 2.70 | 9.03  | 0.87 |
| Subgroup 22            | 1.22  | 0.33 | 0.40  | 0.10 | 0.24  | 0.16 | 0.09  | 0.03 |
| Holophagae             | 0.62  | 0.17 | 0.62  | 0.03 | 0.66  | 0.28 | 0.78  | 0.11 |
| <i>Verrucomicrobia</i> |       |      |       |      |       |      |       |      |
| Spartobacteria         | 2.82  | 1.10 | 9.09  | 2.05 | 6.90  | 0.75 | 5.44  | 2.11 |
| Verrucomicrobiae       | 1.82  | 0.41 | 1.50  | 0.65 | 1.11  | 0.36 | 1.04  | 0.58 |
| OPB35 soil group       | 1.76  | 0.32 | 1.28  | 0.20 | 1.36  | 0.50 | 0.74  | 0.37 |
| <i>Actinobacteria</i>  |       |      |       |      |       |      |       |      |
| Actinobacteria         | 1.59  | 0.34 | 2.39  | 0.32 | 3.12  | 0.90 | 5.46  | 1.17 |
| Thermoleophilia        | 1.22  | 0.37 | 2.60  | 1.15 | 2.27  | 0.95 | 4.85  | 2.91 |
| Acidimicrobiia         | 0.48  | 0.02 | 0.60  | 0.11 | 0.46  | 0.16 | 0.63  | 0.16 |
| <i>Planctomycetes</i>  |       |      |       |      |       |      |       |      |
| Planctomycetacia       | 6.20  | 0.34 | 5.04  | 0.94 | 4.34  | 1.03 | 3.73  | 1.30 |
| Phycisphaerae          | 0.78  | 0.18 | 0.52  | 0.10 | 0.46  | 0.14 | 0.50  | 0.09 |
| <i>Nitrospirae</i>     |       |      |       |      |       |      |       |      |
| Nitrospira             | 3.12  | 0.63 | 1.62  | 0.31 | 0.95  | 0.30 | 0.75  | 0.25 |
| <i>Chloroflexi</i>     |       |      |       |      |       |      |       |      |

|                                        |       |       |       |       |       |       |       |      |
|----------------------------------------|-------|-------|-------|-------|-------|-------|-------|------|
| Anaerolineae                           | 1.43  | 0.58  | 0.52  | 0.11  | 0.26  | 0.12  | 0.23  | 0.01 |
| <i>Firmicutes</i>                      |       |       |       |       |       |       |       |      |
| Bacilli                                | 2.98  | 3.89  | 0.72  | 0.69  | 0.48  | 0.05  | 0.78  | 0.19 |
| <i>Gemmatimonadetes</i>                |       |       |       |       |       |       |       |      |
| Gemmatimonadetes                       | 1.18  | 0.48  | 0.78  | 0.06  | 0.87  | 0.56  | 1.90  | 0.49 |
| <i>Chlorobi</i>                        |       |       |       |       |       |       |       |      |
| Chlorobia                              | 0.61  | 0.11  | 0.56  | 0.07  | 0.34  | 0.10  | 0.13  | 0.03 |
| <b>Archaea</b>                         |       |       |       |       |       |       |       |      |
| <i>Thaumarchaeota</i>                  |       |       |       |       |       |       |       |      |
| Soil Crenarchaeotic Group (SCG)        | 1.92  | 1.99  | 6.61  | 3.47  | 4.08  | 1.31  | 1.77  | 1.22 |
| <b>Fungi</b>                           |       |       |       |       |       |       |       |      |
| Unidentified class                     | 22.14 | 5.30  | 14.48 | 5.25  | 11.89 | 3.51  | 28.29 | 6.66 |
| <i>Ascomycota</i>                      |       |       |       |       |       |       |       |      |
| Dothideomycetes                        | 16.48 | 9.29  | 19.68 | 5.40  | 28.25 | 5.02  | 26.59 | 7.80 |
| Eurotiomycetes                         | 1.46  | 0.65  | 2.94  | 1.12  | 2.55  | 1.22  | 2.60  | 0.83 |
| Leotiomycetes                          | 8.60  | 2.55  | 30.86 | 18.63 | 22.72 | 17.76 | 11.34 | 6.54 |
| Pezizomycetes                          | 3.38  | 5.72  | 0.24  | 0.14  | 2.64  | 3.46  | 1.74  | 2.68 |
| Sordariomycetes                        | 25.04 | 14.51 | 17.82 | 7.79  | 13.23 | 6.71  | 18.34 | 3.08 |
| <i>Basidiomycota</i>                   |       |       |       |       |       |       |       |      |
| Agaricomycetes                         | 14.88 | 15.30 | 4.46  | 2.04  | 4.37  | 1.17  | 1.52  | 1.87 |
| Microbotryomycetes                     | 0.49  | 0.10  | 0.51  | 0.42  | 0.34  | 0.10  | 0.30  | 0.19 |
| Tremellomycetes                        | 1.72  | 0.49  | 3.19  | 1.26  | 3.91  | 1.12  | 4.86  | 1.48 |
| <i>Zygomycota</i>                      |       |       |       |       |       |       |       |      |
| Mortierellomycotina_cls_Incertae_sedis | 4.20  | 2.50  | 4.80  | 1.68  | 9.56  | 11.92 | 3.58  | 2.81 |
| Mucoromycotina_cls_Incertae_sedis      | 0.09  | 0.07  | 0.20  | 0.23  | 0.08  | 0.07  | 0.40  | 0.56 |
| <i>Glomeromycota</i>                   |       |       |       |       |       |       |       |      |
| Glomeromycetes                         | 0.66  | 0.18  | 0.07  | 0.04  | 0.10  | 0.07  | 0.19  | 0.15 |

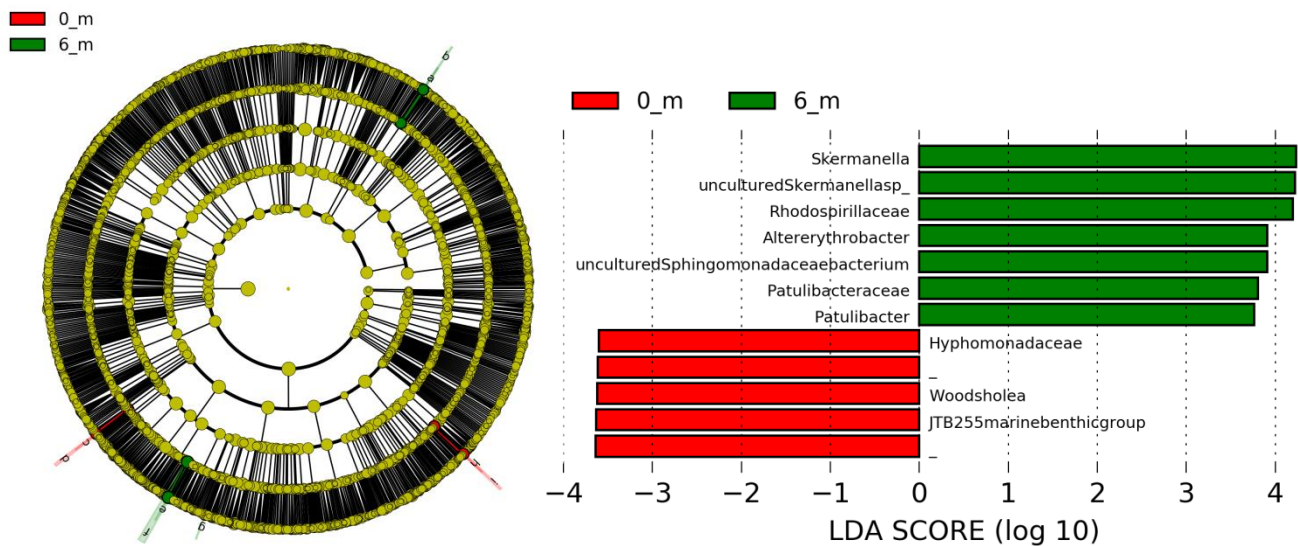

Figure S1. Linear discriminant analysis coupled with effect size (LEfSe) cladogram of bacterial taxa driving dissimilarity among elevations. Symbol diameter is proportional to relative abundance. Colors indicate elevations, and brown symbols indicate non-significant taxa. 0 m and 6 m elevations contribute 100% of taxa driving dissimilarity.
